# Supplementary material for: Development of hypoxia-triggered prodrug micelles as doxorubicin carriers for tumor therapy
Source: Royal Society of Chemistry journal article supplement (doi:10.1039/c4ra14875d), 2015-01-01
Supplement: c4ra14875d1.pdf [file c4ra14875d1.pdf]

## Supporting information

### Development of hypoxia-triggered prodrug micelles as doxorubicin carriers for tumor therapy

Hongmei Liu,<sup>b,c,⊥</sup> Ruilong Zhang,<sup>b,d,⊥</sup> Yunwei Niu,<sup>a</sup> Yan Li,<sup>b,c</sup> Chenmeng Qiao,<sup>e</sup> Jie Weng,<sup>e</sup> Jun Li,<sup>f</sup> Xiaoning Zhang,<sup>\*,f</sup> Zuobing Xiao,<sup>\*,a</sup> Xin Zhang<sup>\*,a,b</sup>

<sup>a</sup> School of Perfume and Aroma Technology, Shanghai Institute of Technology, Shanghai, 200233, China, Email: [xzb@sit.edu.cn](mailto:xzb@sit.edu.cn); [xzhang@ipe.ac.cn](mailto:xzhang@ipe.ac.cn).

<sup>b</sup> National Key Laboratory of Biochemical Engineering, Institute of Process Engineering, Chinese Academy of Sciences, Beijing, 100190, PR China

<sup>c</sup> University of Chinese Academy of Sciences, Beijing, 100049, China

<sup>d</sup> Institute of Materials Science and Engineering, Ocean University of China, Qingdao, Shandong Province, 266100, China

<sup>e</sup> Key Laboratory of Advanced Technologies of Materials, School of Materials Science and Engineering, Southwest Jiaotong University, Chengdu, Sichuan, 610031, China

<sup>f</sup> Collaborative Innovation Center for Biotherapy, School of Medicine, Tsinghua University, Beijing 100084, China, E-mail: [drugman@tsinghua.edu.cn](mailto:drugman@tsinghua.edu.cn)

## Experimental Section

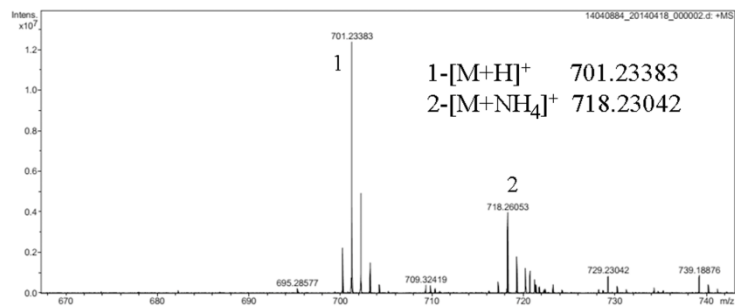

**Fig. S1** High resolution mass spectroscopy to determine the exact mass and the corresponding molecular formula of the C6-AZO-CA4.
